# Supplementary material
Source: ML conference proceedings conference paper supplement (https://openaccess.thecvf.com/content/ICCV2023/html/Lee_ExBluRF_Efficient_Radiance_ICCV_2023_paper.html)
Supplement: Supplementary file 1 [file Lee_ExBluRF_Efficient_Radiance_ICCV_2023_supplemental.zip]

Archive with 4 entries (4 files):
- 04826-supp.mp4
- __MACOSX/._04826-supp.mp4
- 04826-supp.pdf
- __MACOSX/._04826-supp.pdf
