# Supplementary material
Source: ML conference proceedings conference paper supplement (https://openaccess.thecvf.com/content/ICCV2023/html/Lee_ExBluRF_Efficient_Radiance_ICCV_2023_paper.html)
Supplement: Supplementary file 1 [file Lee_ExBluRF_Efficient_Radiance_ICCV_2023_supplemental.zip › 04826-supp.pdf]

## *Supplementary Material for* **ExBluRF: Efficient Radiance Fields for Extreme Motion Blur**

| Blur Model | Radiance Fields | N  | PSNR  | SSIM  | LPIPS | Blur Model | Radiance Fields | N  | PSNR  | SSIM  | LPIPS |
|------------|-----------------|----|-------|-------|-------|------------|-----------------|----|-------|-------|-------|
| 2D Kernel  | Neural          | 5  | 20.39 | 0.472 | 0.462 | Cam. Traj. | Neural          | 5  | 21.21 | 0.522 | 0.391 |
|            |                 | 11 | 21.29 | 0.533 | 0.396 |            |                 | 11 | 22.01 | 0.632 | 0.297 |
|            |                 | 21 | 21.22 | 0.539 | 0.368 |            |                 | 21 | 22.41 | 0.672 | 0.239 |
| Blur Model | Radiance Fields | N  | PSNR  | SSIM  | LPIPS | Blur Model | Radiance Fields | N  | PSNR  | SSIM  | LPIPS |
| 2D Kernel  | Voxel           | 5  | 20.18 | 0.465 | 0.518 | Cam. Traj. | Voxel           | 5  | 23.24 | 0.613 | 0.411 |
|            |                 | 11 | 22.12 | 0.556 | 0.442 |            |                 | 11 | 26.42 | 0.755 | 0.304 |
|            |                 | 21 | 21.57 | 0.537 | 0.437 |            |                 | 21 | 26.96 | 0.753 | 0.328 |

Table 1: Ablation of the effectiveness of the proposed components on "Factory" scene of synthetic dataset.  $N$  refers to the number of sampling for blur reconstruction (kernel size). The 2D kernel-based blur model with neural radiance fields and the kernel size  $N = 5$  (left-top) is the original configuration and official implementation of DeblurNeRF [3]. Our camera trajectory-based blur model and voxel-based radiance fields are decomposed to evaluate quantitative metrics for novel view synthesis.

In the supplementary material, we provide more discussions, comparison results, and other details that could not be included in the main manuscript due to lack of space. The contents are summarized below:

- S1.** Additional Ablation Study
- S2.** Limitations and Future Works
- S3.** Description for Supplementary Video
- S4.** Gradient to Camera Trajectory
- S5.** All comparison results

### **S1. Additional Ablation Study**

We quantitatively compare the performance gain of the proposed camera trajectory-based blur model to the 2D kernel-based model of DeblurNeRF [3] in Tab. 1. In the same radiance fields model and the number of sampling  $N$ , our blur model outperforms the 2D kernel model with significant margins. Since the challenging camera motion consists of a complex trajectory with severe orientation changes, 2D kernel estimation may suffer from enlarging the kernel window size. In addition, the pixel-wise kernel estimation is difficult to leverage the prior knowledge that the camera is moving on a single trajectory and rays are sequentially accumulated. Therefore, the deblurring performance is less improved with the increasing kernel size as reported in [3]. On the other hand, our model directly

formulates the motion blur in *6-degree of freedom* (DOF) camera poses, which accords with the physical motion blur operation of the camera. The comparison by interchanging radiance fields model shows that the camera-based blur model is proper to optimize extreme motion blurred images regardless of the architecture of radiance fields. Furthermore, the camera trajectory-based blur model shows better compatibility with voxel-based radiance fields where PSNR and SSIM are substantially improved only with the proposed blur model.

### **S2. Limitations and Future Works**

ExBluRF leverages the voxel-based radiance fields to increase the number of sampling for blur reconstruction with efficient computational cost. Regardless of deblurring performance, the voxel-based radiance fields can fail to render the rays that is out of the boundary of voxel grids. In addition, the optimization of the proposed method begins with the initial camera poses that are obtained from COLMAP [7]. Even though the proposed camera trajectory-based blur model has the ability to correct inaccurate initial poses, the optimization cannot be started on the scene where COLMAP fails to a total extent. These limitations of ExBluRF lead to our future plans: 1) Deformable sparse voxel-based radiance fields that are able to

extend the boundaries from the initial cube-shaped voxel grids. 2) Pose-free end-to-end optimization of ExBluRF from extreme motion blurred images.

### S3. Description for Supplementary Video

We report a video that shows novel view synthesis. The novel views are generated by spiral motion for the real scenes, which is the most widely used visualization for NeRF-based approaches. ExBluRF reconstructs startlingly sharp 3D scenes from extreme motion blurred images with much fewer 3D artifacts compared to DeblurNeRF [3].

### S4. Gradient to Camera Trajectory

We extend an implementation of CUDA [5] kernel to backpropagate the gradient to our camera trajectory-based blur model. From the equation of trilinear interpolation and differentiable volume rendering of voxel grid, we derive the gradient from the photo-consistency loss to the ray’s origin and direction. Note that, the ray origin and direction are a function of camera pose in our model, and the backpropagation of this part is computed by the automatic differentiation of PyTorch [6].

**Gradients of trilinear interpolation.** Let  $\mathbf{X}_k = \mathbf{o} + s_k \cdot \mathbf{d}$  denotes the 3D location of  $k^{th}$  ray sample point with the step size  $s_k$ . The gradient of the  $k^{th}$  sample point to the ray’s origin and direction are derived by:

$$\begin{aligned} \frac{\partial \mathbf{X}_k}{\partial \mathbf{o}} &= \mathbb{1}, \\ \frac{\partial \mathbf{X}_k}{\partial \mathbf{d}} &= s_k. \end{aligned} \quad (1)$$

The volume density  $\sigma_k$  and color  $\mathbf{c}_k$  of  $\mathbf{X}_k$  is trilinear interpolated from voxel grids  $\mathcal{G}_\sigma(\mathbf{X}_k)$  and  $\mathcal{G}_{sh}(\mathbf{X}_k)$ . Let  $\mathbf{v}_\sigma^{x,y,z} \in \mathbb{R}$  and  $\mathbf{v}_{sh}^{x,y,z} \in \mathbb{R}^9$  denote the interpolated volume density and spherical harmonic (SH) coefficients of  $\mathbf{X}_k$ , as shown in Fig. 1. The gradient of voxel grids’ trilinear interpolation to  $\mathbf{X}_k$  are:

$$\begin{aligned} \frac{\partial \mathcal{G}_\sigma(\mathbf{X}_k)}{\partial \mathbf{o}} &= \frac{\partial \mathcal{G}_\sigma(\mathbf{X}_k)}{\partial \mathbf{X}_k} \cdot \frac{\partial \mathbf{X}_k}{\partial \mathbf{o}} \\ &= \begin{bmatrix} \mathbf{v}_\sigma^{\lceil x \rceil, y, z} - \mathbf{v}_\sigma^{\lfloor x \rfloor, y, z} \\ \mathbf{v}_\sigma^{x, \lceil y \rceil, z} - \mathbf{v}_\sigma^{x, \lfloor y \rfloor, z} \\ \mathbf{v}_\sigma^{x, y, \lceil z \rceil} - \mathbf{v}_\sigma^{x, y, \lfloor z \rfloor} \end{bmatrix}, \\ \frac{\partial \mathcal{G}_\sigma(\mathbf{X}_k)}{\partial \mathbf{d}} &= \frac{\partial \mathcal{G}_\sigma(\mathbf{X}_k)}{\partial \mathbf{X}_k} \cdot \frac{\partial \mathbf{X}_k}{\partial \mathbf{d}} \\ &= \begin{bmatrix} \mathbf{v}_\sigma^{\lceil x \rceil, y, z} - \mathbf{v}_\sigma^{\lfloor x \rfloor, y, z} \\ \mathbf{v}_\sigma^{x, \lceil y \rceil, z} - \mathbf{v}_\sigma^{x, \lfloor y \rfloor, z} \\ \mathbf{v}_\sigma^{x, y, \lceil z \rceil} - \mathbf{v}_\sigma^{x, y, \lfloor z \rfloor} \end{bmatrix} \cdot s_k, \end{aligned} \quad (2)$$

where  $\lceil \cdot \rceil$  and  $\lfloor \cdot \rfloor$  denote ceil and floor operation to designate the voxel value covering  $\mathbf{X}_k$ , respectively. Note that,

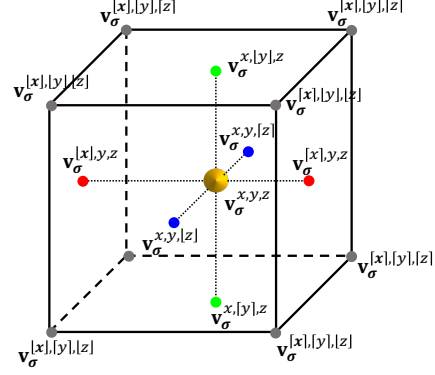

Figure 1: Visualization of trilinear interpolation from the nearest voxel grids to the ray sample point.

the same differentiation is applied to  $\frac{\partial \mathcal{G}_{sh}(\mathbf{X}_k)}{\partial \mathbf{o}} \in \mathbb{R}^{3 \times 9}$  and  $\frac{\partial \mathcal{G}_{sh}(\mathbf{X}_k)}{\partial \mathbf{d}} \in \mathbb{R}^{3 \times 9}$  without loss of generality.

**Gradients of volume rendering.** Along the ray sample points  $\{\mathbf{X}_k\}_{k=1}^{N_k}$ , the color of the ray  $\hat{\mathbf{C}}(r)$  is computed by the differentiable volume rendering [2] as follows:

$$\hat{\mathbf{C}}(\mathbf{r}) = \sum_{k=1}^{N_k} w_k \cdot \mathbf{c}_k, \quad (3)$$

$$\text{where } w_k = \exp\left(-\sum_{j=1}^{k-1} \sigma_j \delta_j\right) \cdot (1 - \exp(-\sigma_k \delta_k)),$$

where  $\delta_k$  is the distance between the  $(k-1)^{th}$  and  $k^{th}$  sample points. The color of ray is computed by the weighted sum of  $\{\mathbf{c}_k\}_{k=1}^{N_k}$ , where the weights  $\{w_k\}_{k=1}^{N_k}$  are a function of  $\{\sigma_k = \mathcal{G}_\sigma(\mathbf{X}_k)\}_{k=1}^{N_k}$ . From Eq. 3, the gradient of  $w_k$  to  $\{\sigma_k\}_{k=1}^{N_k}$  is derived by:

$$\frac{\partial w_k}{\partial \sigma_j} = \begin{cases} -\delta_j \exp\left(-\sum_{j=1}^{k-1} \sigma_j \delta_j\right) (1 - \exp(-\sigma_k \delta_k)) & j < k \\ \delta_k \exp\left(-\sum_{j=1}^{k-1} \sigma_j \delta_j\right) \exp(-\sigma_k \delta_k) & j = k \end{cases} \quad (4)$$

Additionally, the colors of ray sample points are computed from a SH function that is  $\{\mathbf{c}_k = S(\mathbf{d})^\top \cdot \mathcal{G}_{sh}(\mathbf{X}_k)\}_{k=1}^{N_k}$ . Therefore, the gradients of  $\mathbf{c}_k$  to spherical harmonic function and coefficients are:

$$\begin{aligned} \frac{\partial \mathbf{c}_k}{\partial S(\mathbf{d})} &= \mathcal{G}_{sh}(\mathbf{X}_k), \\ \frac{\partial \mathbf{c}_k}{\partial \mathcal{G}_{sh}(\mathbf{X}_k)} &= S(\mathbf{d}). \end{aligned} \quad (5)$$

**Gradients from Loss Function.** Finally, the gradient from the photo-consistency loss to the ray’s origin and directions derived by chain rule as follows:

$$\mathcal{L}_{color} = \|\hat{\mathbf{C}}(\mathbf{r}) - C_{gt}(\mathbf{r})\|_2^2, \quad (6)$$

$$\begin{aligned}
\frac{\partial \mathcal{L}_{color}}{\partial \mathbf{o}} &= \frac{\partial \mathcal{L}_{color}}{\partial \hat{C}(\mathbf{r})} \cdot \frac{\partial \hat{C}(\mathbf{r})}{\partial \mathbf{o}} \\
&= \frac{\partial \mathcal{L}_{color}}{\partial \hat{C}(\mathbf{r})} \left( \sum_{k=1}^{N_k} \frac{\partial \hat{C}(\mathbf{r})}{\partial w_k} \cdot \frac{\partial w_k}{\partial \mathbf{o}} + \frac{\partial \hat{C}(\mathbf{r})}{\partial \mathbf{c}_k} \cdot \frac{\partial \mathbf{c}_k}{\partial \mathbf{o}} \right) \\
&= \frac{\partial \mathcal{L}_{color}}{\partial \hat{C}(\mathbf{r})} \left( \sum_{k=1}^{N_k} \frac{\partial \hat{C}(\mathbf{r})}{\partial w_k} \cdot \frac{\partial w_k}{\mathcal{G}_\sigma(\mathbf{X}_k)} \cdot \frac{\mathcal{G}_\sigma(\mathbf{X}_k)}{\partial \mathbf{o}} \right. \\
&\quad \left. + \sum_{k=1}^{N_k} \frac{\partial \hat{C}(\mathbf{r})}{\partial \mathbf{c}_k} \cdot \frac{\partial \mathbf{c}_k}{\mathcal{G}_{sh}(\mathbf{X}_k)} \cdot \frac{\mathcal{G}_{sh}(\mathbf{X}_k)}{\partial \mathbf{o}} \right), \tag{7}
\end{aligned}$$

$$\begin{aligned}
\frac{\partial \mathcal{L}_{color}}{\partial \mathbf{d}} &= \frac{\partial \mathcal{L}_{color}}{\partial \hat{C}(\mathbf{r})} \cdot \frac{\partial \hat{C}(\mathbf{r})}{\partial \mathbf{d}} \\
&= \frac{\partial \mathcal{L}_{color}}{\partial \hat{C}(\mathbf{r})} \left( \sum_{k=1}^{N_k} \frac{\partial \hat{C}(\mathbf{r})}{\partial w_k} \cdot \frac{\partial w_k}{\partial \mathbf{d}} + \frac{\partial \hat{C}(\mathbf{r})}{\partial \mathbf{c}_k} \cdot \frac{\partial \mathbf{c}_k}{\partial \mathbf{d}} \right) \\
&= \frac{\partial \mathcal{L}_{color}}{\partial \hat{C}(\mathbf{r})} \left( \sum_{k=1}^{N_k} \frac{\partial \hat{C}(\mathbf{r})}{\partial w_k} \cdot \frac{\partial w_k}{\mathcal{G}_\sigma(\mathbf{X}_k)} \cdot \frac{\mathcal{G}_\sigma(\mathbf{X}_k)}{\partial \mathbf{d}} \right. \\
&\quad \left. + \sum_{k=1}^{N_k} \frac{\partial \hat{C}(\mathbf{r})}{\partial \mathbf{c}_k} \cdot \frac{\partial \mathbf{c}_k}{\mathcal{G}_{sh}(\mathbf{X}_k)} \cdot \frac{\mathcal{G}_{sh}(\mathbf{X}_k)}{\partial \mathbf{d}} \right. \\
&\quad \left. + \sum_{k=1}^{N_k} \frac{\partial \hat{C}(\mathbf{r})}{\partial \mathbf{c}_k} \cdot \frac{\partial \mathbf{c}_k}{S(\mathbf{d})} \cdot \frac{S(\mathbf{d})}{\partial \mathbf{d}} \right), \tag{8}
\end{aligned}$$

where  $\frac{\partial \mathcal{L}_{color}}{\partial \hat{C}(\mathbf{r})} = 2(\hat{C}(\mathbf{r}) - C_{gt}(\mathbf{r}))$  is derivative of mean squared error (MSE). All the other terms are derived in Sec. S4. Note that the SH function  $S(\cdot)$  is only dependent on the ray’s direction  $\mathbf{d}$ . We implemented the described differentiation in a CUDA [5] kernel for a single ray, and the blur operation with camera trajectory is implemented in auto-grad functions of PyTorch [6].

## S5. All Comparison Results

We report all the quantitative and qualitative results compared on our main manuscript in Tab. 2, 3, 4 and Fig. 2, 3, 4, 5. ExBluRF shows the best deblurring on qualitative results, where the differences are larger in extremely blurred scenes. However, for some real scenes, ExBluRF shows quantitatively lower performance compared to DeblurNeRF [3]. As mentioned in Sec. S2, this is due to the limitation of the voxel-based radiance fields that cannot generate colors when the test view has unseen regions in training views. This is applied equally to neural radiance fields, but neural radiance fields fill these regions in an implicit manner even though the colors are slightly inaccurate.

## References

[1] Liangyu Chen, Xiaojie Chu, Xiangyu Zhang, and Jian Sun. Simple baselines for image restoration. In *ECCV*, 2022. 4

[2] James T Kajiya and Brian P Von Herzen. Ray tracing volume densities. *ACM SIGGRAPH*, 18(3):165–174, 1984. 2

[3] Li Ma, Xiaoyu Li, Jing Liao, Qi Zhang, Xuan Wang, Jue Wang, and Pedro V. Sander. Deblur-nerf: Neural radiance fields from blurry images. In *CVPR*, 2022. 1, 2, 3, 4, 7, 8

[4] Ben Mildenhall, Pratul P Srinivasan, Matthew Tancik, Jonathan T Barron, Ravi Ramamoorthi, and Ren Ng. Nerf: Representing scenes as neural radiance fields for view synthesis. In *ECCV*, 2020. 5, 6, 7, 8

[5] NVIDIA, Péter Vingelmann, and Frank H.P. Fitzek. Cuda, release: 10.2.89, 2020. 2, 3

[6] Adam Paszke, Sam Gross, Francisco Massa, Adam Lerer, James Bradbury, Gregory Chanan, Trevor Killeen, Zeming Lin, Natalia Gimelshein, Luca Antiga, Alban Desmaison, Andreas Kopf, Edward Yang, Zachary DeVito, Martin Raison, Alykhan Tejani, Sasank Chilamkurthy, Benoit Steiner, Lu Fang, Junjie Bai, and Soumith Chintala. Pytorch: An imperative style, high-performance deep learning library. In *NeurIPS*. 2019. 2, 3

[7] Johannes L Schonberger and Jan-Michael Frahm. Structure-from-motion revisited. In *CVPR*, 2016. 1

[8] Syed Waqas Zamir, Aditya Arora, Salman Khan, Munawar Hayat, Fahad Shahbaz Khan, and Ming-Hsuan Yang. Restormer: Efficient transformer for high-resolution image restoration. In *CVPR*, 2022. 4

| Method                | Bench        |              |              | Camellia     |              |              | Dragon       |              |              | Jars         |              |              |  |
|-----------------------|--------------|--------------|--------------|--------------|--------------|--------------|--------------|--------------|--------------|--------------|--------------|--------------|--|
|                       | PSNR↑        | SSIM↑        | LPIPS↓       |  |
| Restormer [8]+NeRF    | 24.28        | 0.596        | 0.511        | 23.03        | 0.494        | 0.610        | 27.57        | 0.539        | 0.579        | 23.72        | 0.510        | 0.605        |  |
| NAFNet [1]+NeRF       | 25.58        | 0.593        | 0.517        | 23.95        | 0.516        | 0.571        | 29.79        | 0.593        | 0.589        | 25.79        | 0.581        | 0.504        |  |
| DeblurNeRF [3]        | 30.07        | 0.749        | 0.347        | 27.76        | 0.655        | 0.365        | <b>31.92</b> | <b>0.708</b> | 0.418        | 27.73        | 0.669        | 0.456        |  |
| <b>ExBluRF (Ours)</b> | <b>30.99</b> | <b>0.782</b> | <b>0.223</b> | <b>28.83</b> | <b>0.705</b> | <b>0.265</b> | 30.65        | 0.701        | <b>0.417</b> | <b>29.67</b> | <b>0.378</b> | <b>0.308</b> |  |

  

| Method                | Jars2        |              |              | Postbox      |              |              | Stone_Lantern |              |              | Sunflowers   |              |              | Average      |              |              |
|-----------------------|--------------|--------------|--------------|--------------|--------------|--------------|---------------|--------------|--------------|--------------|--------------|--------------|--------------|--------------|--------------|
|                       | PSNR↑        | SSIM↑        | LPIPS↓       | PSNR↑        | SSIM↑        | LPIPS↓       | PSNR↑         | SSIM↑        | LPIPS↓       | PSNR↑        | SSIM↑        | LPIPS↓       | PSNR↑        | SSIM↑        | LPIPS↓       |
| Restormer [8]+NeRF    | 21.92        | 0.563        | 0.563        | 23.70        | 0.548        | 0.511        | 24.23         | 0.619        | 0.544        | 26.21        | 0.695        | 0.443        | 24.33        | 0.570        | 0.546        |
| NAFNet [1]+NeRF       | 24.82        | 0.641        | 0.470        | 24.72        | 0.580        | 0.429        | 26.32         | 0.676        | 0.456        | 27.34        | 0.714        | 0.414        | 26.03        | 0.612        | 0.494        |
| DeblurNeRF [3]        | 27.26        | 0.682        | 0.475        | 28.48        | 0.712        | 0.345        | 27.08         | 0.700        | 0.468        | 30.66        | 0.800        | 0.342        | 28.87        | 0.709        | 0.402        |
| <b>ExBluRF (Ours)</b> | <b>29.93</b> | <b>0.770</b> | <b>0.240</b> | <b>30.22</b> | <b>0.768</b> | <b>0.230</b> | <b>28.45</b>  | <b>0.731</b> | <b>0.380</b> | <b>32.36</b> | <b>0.837</b> | <b>0.268</b> | <b>30.17</b> | <b>0.757</b> | <b>0.284</b> |

Table 2: Quantitative comparison of novel view synthesis on ExBlur dataset (proposed).

| Method                | Cozyroom     |              |              | Factory      |              |              | Pool         |              |              | Tanabata     |              |              | Trolley      |              |              | Average      |              |              |
|-----------------------|--------------|--------------|--------------|--------------|--------------|--------------|--------------|--------------|--------------|--------------|--------------|--------------|--------------|--------------|--------------|--------------|--------------|--------------|
|                       | PSNR↑        | SSIM↑        | LPIPS↓       |
| Restormer [8]+NeRF    | 22.42        | 0.680        | 0.252        | 17.87        | 0.339        | 0.574        | 26.21        | 0.637        | 0.410        | 19.76        | 0.527        | 0.426        | 19.50        | 0.522        | 0.435        | 21.15        | 0.541        | 0.419        |
| NAFNet [1]+NeRF       | 20.37        | 0.596        | 0.400        | 18.23        | 0.356        | 0.522        | 26.27        | 0.636        | 0.403        | 19.50        | 0.518        | 0.422        | 19.56        | 0.525        | 0.439        | 20.78        | 0.526        | 0.437        |
| DeblurNeRF [3]        | 24.48        | 0.778        | 0.218        | 20.39        | 0.472        | 0.461        | 28.45        | 0.743        | 0.270        | 22.79        | 0.698        | 0.315        | 23.81        | 0.745        | 0.239        | 23.98        | 0.687        | 0.301        |
| <b>ExBluRF (Ours)</b> | <b>28.55</b> | <b>0.876</b> | <b>0.121</b> | <b>26.96</b> | <b>0.753</b> | <b>0.328</b> | <b>30.05</b> | <b>0.811</b> | <b>0.251</b> | <b>26.91</b> | <b>0.847</b> | <b>0.212</b> | <b>25.92</b> | <b>0.810</b> | <b>0.267</b> | <b>27.81</b> | <b>0.823</b> | <b>0.227</b> |

Table 3: Quantitative comparison of novel view synthesis on the synthetic dataset.

| Method                | Ball         |              |              | Basket       |              |              | Buick        |              |              | Coffee       |              |              | Decoration   |              |              |  |
|-----------------------|--------------|--------------|--------------|--------------|--------------|--------------|--------------|--------------|--------------|--------------|--------------|--------------|--------------|--------------|--------------|--|
|                       | PSNR↑        | SSIM↑        | LPIPS↓       |  |
| Restormer [8]+NeRF    | 25.01        | 0.681        | 0.325        | 24.21        | 0.743        | 0.268        | 21.99        | 0.661        | 0.278        | 27.73        | 0.845        | 0.201        | 23.00        | 0.713        | 0.283        |  |
| NAFNet [1]+NeRF       | 26.28        | 0.716        | 0.291        | 26.57        | 0.797        | 0.229        | 23.17        | 0.700        | 0.213        | 29.37        | 0.861        | 0.157        | 23.92        | 0.730        | 0.247        |  |
| DeblurNeRF [3]        | 27.42        | 0.770        | 0.230        | 27.31        | 0.834        | 0.144        | 24.44        | 0.762        | 0.178        | 30.47        | 0.889        | 0.129        | <b>24.07</b> | <b>0.767</b> | <b>0.177</b> |  |
| <b>ExBluRF (Ours)</b> | <b>28.35</b> | <b>0.791</b> | <b>0.205</b> | <b>28.86</b> | <b>0.875</b> | <b>0.126</b> | <b>25.95</b> | <b>0.809</b> | <b>0.154</b> | <b>32.44</b> | <b>0.915</b> | <b>0.101</b> | 23.51        | 0.740        | 0.275        |  |

  

| Method                | Girl         |              |              | Heron        |              |              | Parterre     |              |              | Puppet       |              |              | Stair        |              |              | Average      |              |              |
|-----------------------|--------------|--------------|--------------|--------------|--------------|--------------|--------------|--------------|--------------|--------------|--------------|--------------|--------------|--------------|--------------|--------------|--------------|--------------|
|                       | PSNR↑        | SSIM↑        | LPIPS↓       |
| Restormer [8]+NeRF    | 20.16        | 0.725        | 0.282        | 19.59        | 0.572        | 0.331        | 23.75        | 0.676        | 0.317        | 22.69        | 0.654        | 0.278        | 24.06        | 0.555        | 0.328        | 23.22        | 0.682        | 0.289        |
| NAFNet [1]+NeRF       | 21.91        | 0.778        | 0.217        | 21.51        | 0.640        | 0.292        | 21.71        | 0.647        | 0.336        | 24.44        | 0.721        | 0.225        | 23.40        | 0.503        | 0.317        | 24.23        | 0.709        | 0.252        |
| DeblurNeRF [3]        | <b>22.30</b> | <b>0.792</b> | <b>0.171</b> | <b>22.63</b> | <b>0.682</b> | <b>0.212</b> | <b>25.83</b> | <b>0.761</b> | <b>0.209</b> | 24.80        | 0.734        | 0.163        | 25.69        | 0.645        | 0.213        | 25.49        | 0.763        | <b>0.182</b> |
| <b>ExBluRF (Ours)</b> | 21.80        | 0.770        | 0.205        | 22.52        | 0.676        | 0.281        | 24.97        | 0.768        | 0.227        | <b>25.12</b> | <b>0.758</b> | <b>0.181</b> | <b>25.78</b> | <b>0.647</b> | <b>0.229</b> | <b>25.93</b> | <b>0.775</b> | 0.198        |

Table 4: Quantitative comparison of novel view synthesis on the real dataset of DeblurNeRF [3].

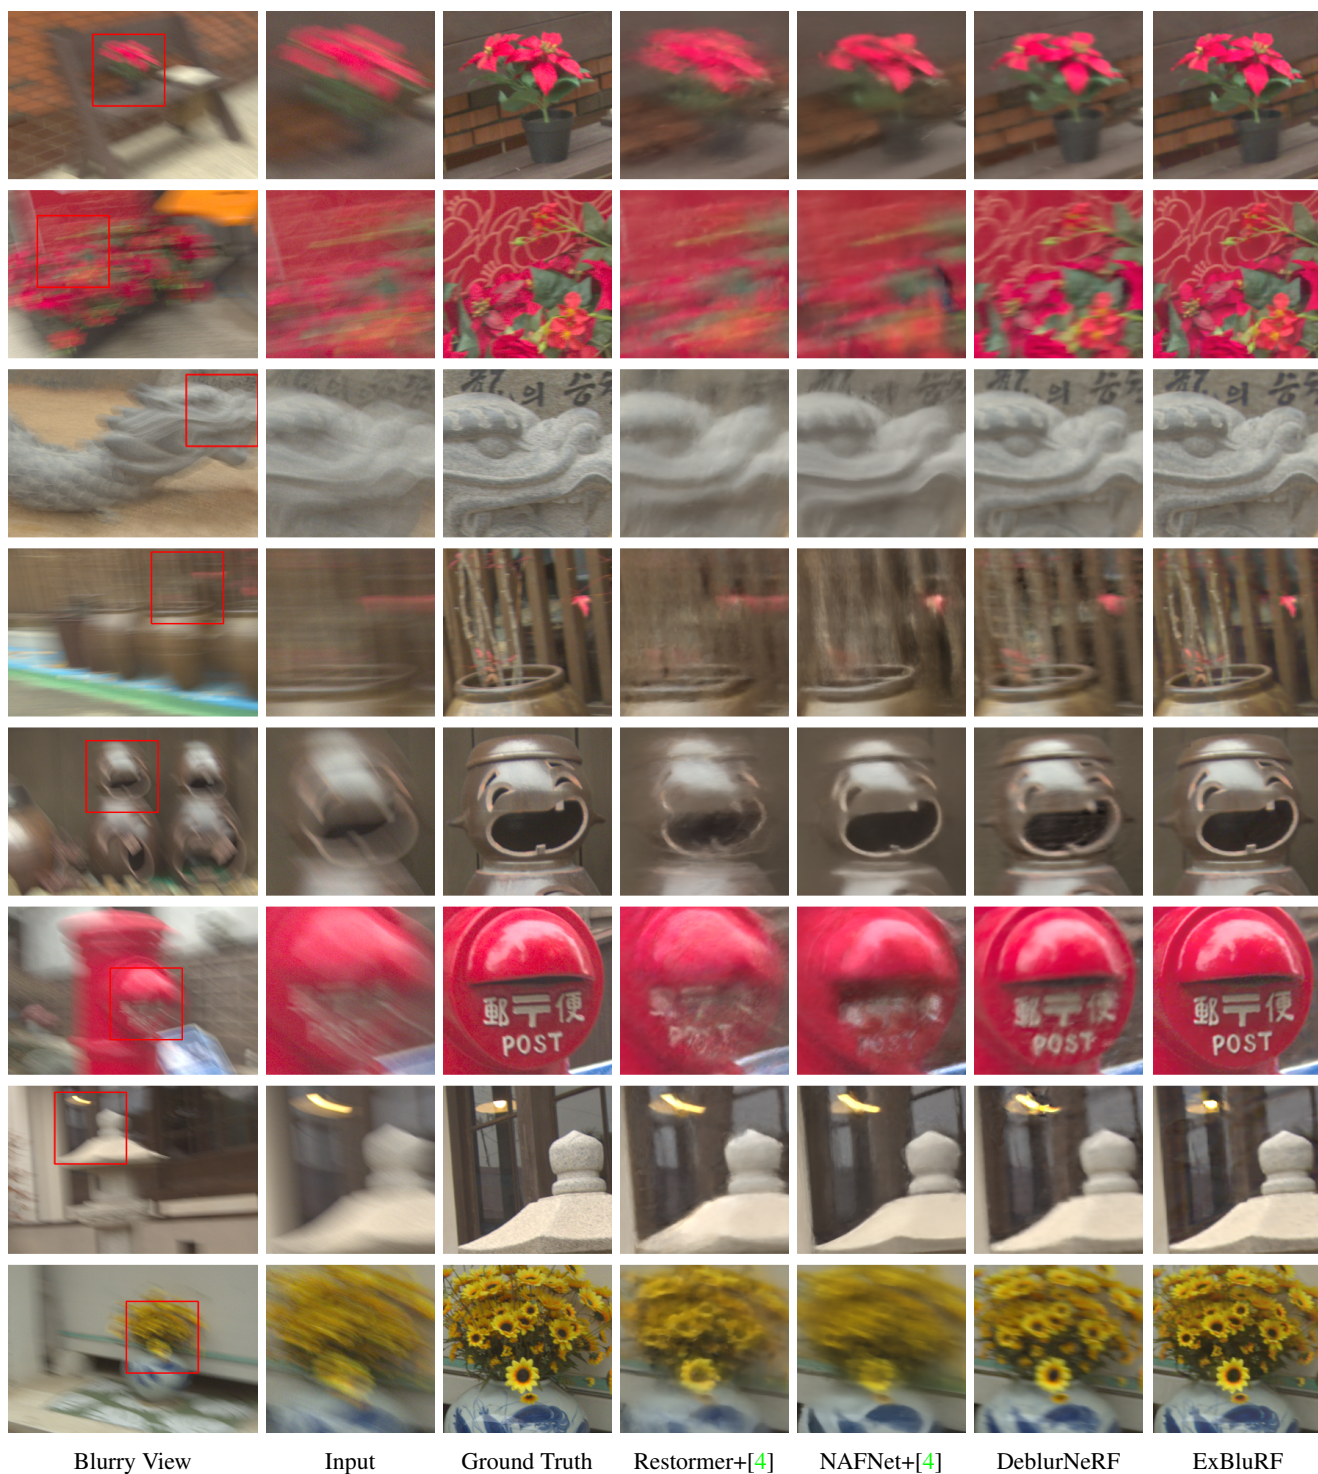

Figure 2: Qualitative comparison of deblurring on ExBlur dataset (proposed).

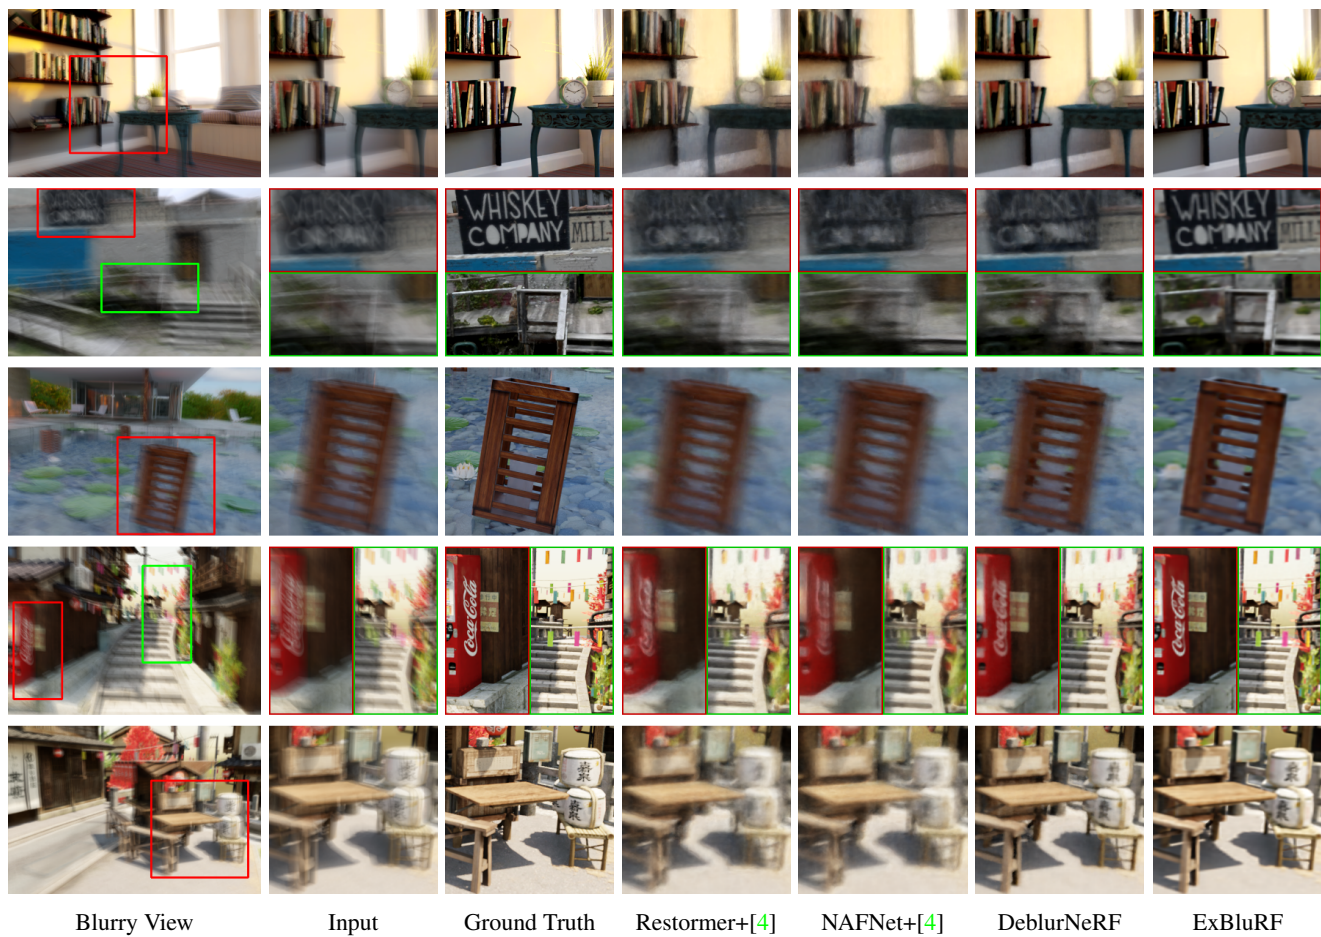

Figure 3: Qualitative comparison of deblurring on the synthetic dataset.

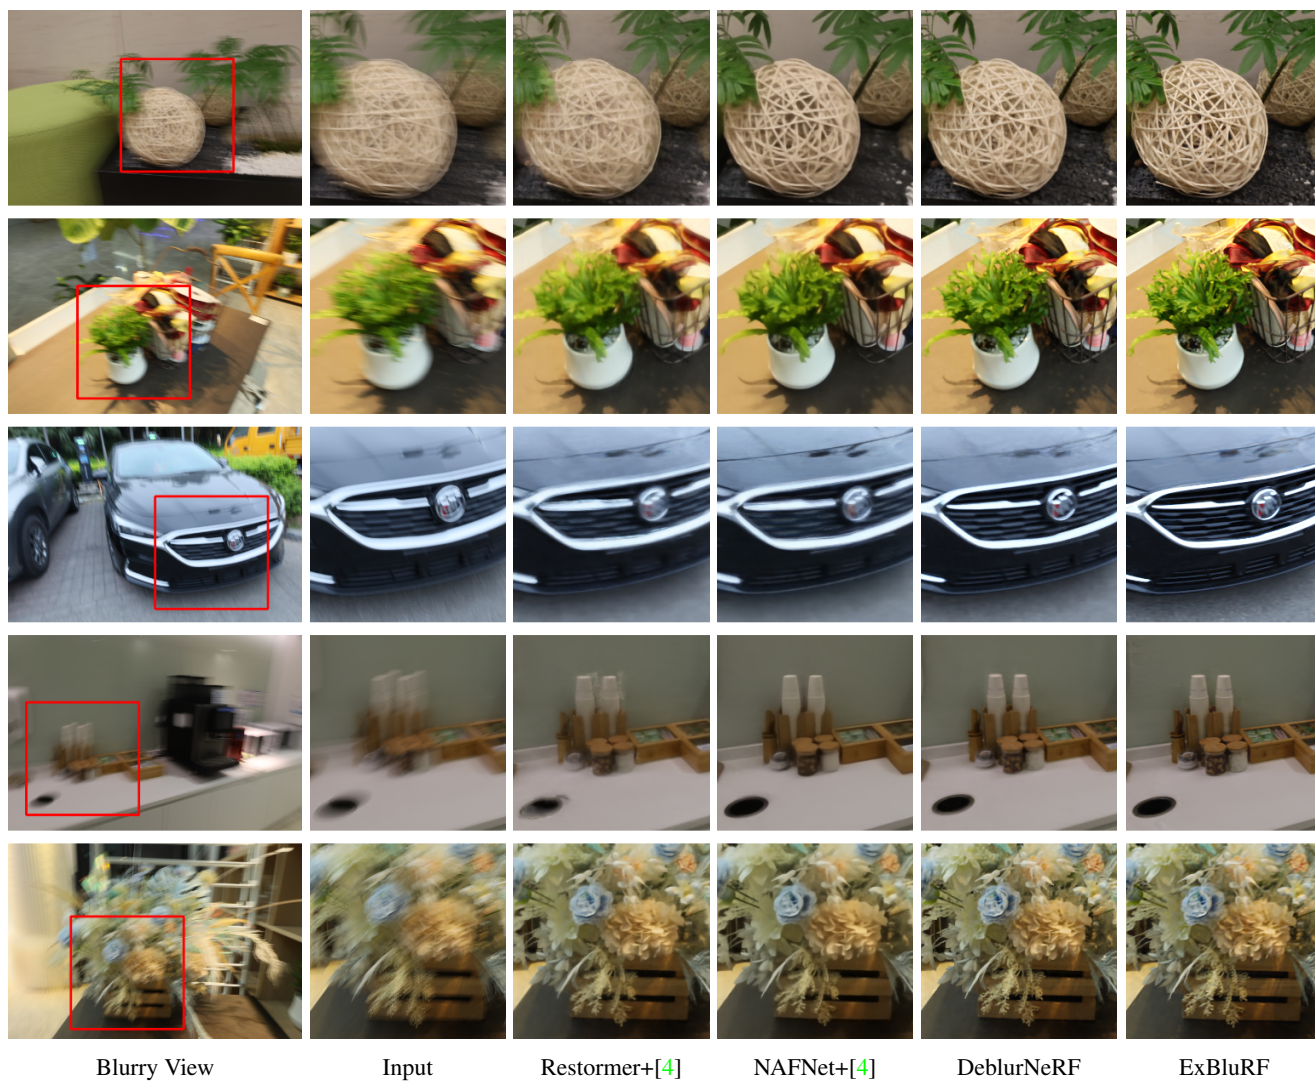

Figure 4: Qualitative comparison of deblurring on the real dataset of DeblurNeRF [3].

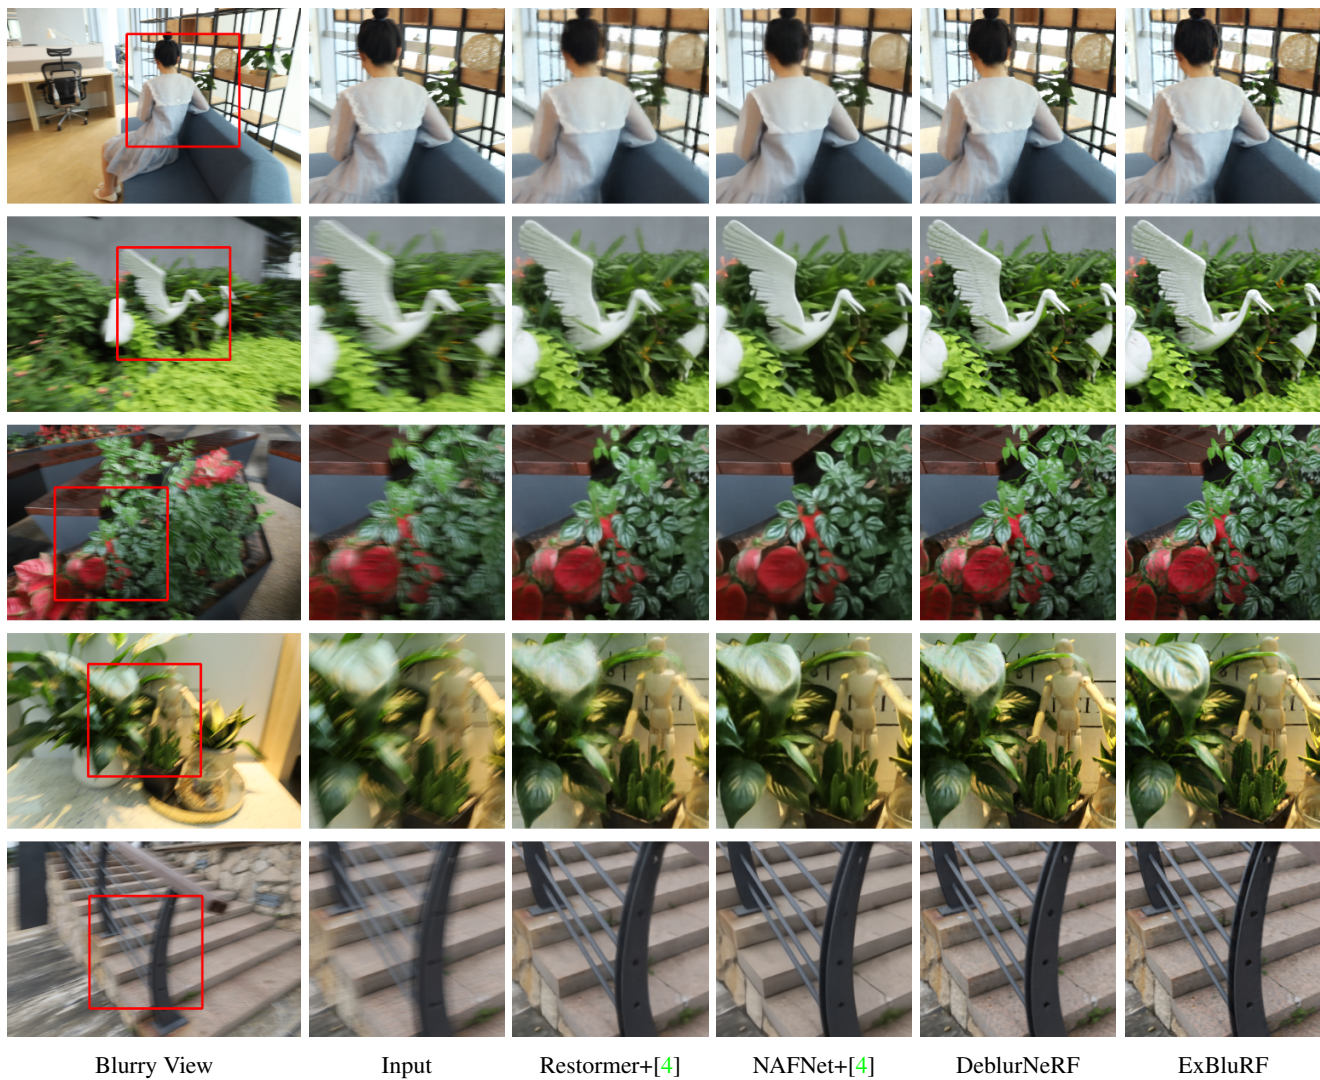

Figure 5: Qualitative comparison of deblurring on the real dataset of DeblurNeRF [3].
